# Supplementary material for: Readiness of health facilities to deliver non-communicable diseases services in Kenya: a national cross-sectional survey
Source: Springer Nature journal article supplement (doi:10.1186/s12913-022-08364-w), 2022-08-02
Supplement: MOESM1 [file 23328972]

Additional File 1: Facility Assessment Questionnaire for Noncommunicable Diseases Management

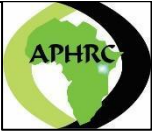

**African Population & Health Research Center**

**Facility Assessment Questionnaire**

County: \_\_\_\_\_

Interviewer: \_\_\_\_\_

Data collection date: | d | d | | m | m | m | | y | y | y | y |

Facility name: \_\_\_\_\_

Facility setting type: <sub>1</sub> Public <sub>2</sub> Private for profit <sub>3</sub> Private-faith based

Facility Level <sub>1</sub> level II <sub>2</sub> Level III <sub>3</sub> Level IV <sub>4</sub> Level V <sub>5</sub> level VI

GPS Info: \_\_\_\_\_/\_\_\_\_\_  
[Latitude] [Longitude]

**A. General Information**

This facility serves: \_\_\_\_\_/\_\_\_\_\_/\_\_\_\_\_/\_\_\_\_\_  
[County] [sub-county] [Location] [sub-location]

How many primary health care facilities serve this area? \_\_\_\_\_ **public** facilities \_\_\_\_\_ **mission/private facilities**

How many people this facility serves? \_\_\_\_\_ households \_\_\_\_\_ people

## B. Equipment & Service Availability

Availability of basic equipment for chronic diseases (CDs) management (number of **functional** devices available)

*\*Note: fill in "0" if there is none (this note applies to all the following questions involved with numbers)*

| Equipment | Weighing machines | Measuring tape | Stethoscope | Glucometer | ECG machines |
|-----------|-------------------|----------------|-------------|------------|--------------|
| Number    | _____             | _____          | _____       | _____      | _____        |

### Availability of Blood Pressure Measuring Devices (BPMDs):

| Type                              | Number     | How often are BPMDs calibrated for accuracy?                                                                                                                                                                       |
|-----------------------------------|------------|--------------------------------------------------------------------------------------------------------------------------------------------------------------------------------------------------------------------|
| Mercury                           | _____<br>- | <input type="checkbox"/> <sub>1</sub> Once a year or more <input type="checkbox"/> <sub>2</sub> Less than once a year <input type="checkbox"/> <sub>3</sub> Never <input type="checkbox"/> <sub>4</sub> Don't know |
| Aneroid                           | _____<br>- | <input type="checkbox"/> <sub>1</sub> Once a year or more <input type="checkbox"/> <sub>2</sub> Less than once a year <input type="checkbox"/> <sub>3</sub> Never <input type="checkbox"/> <sub>4</sub> Don't know |
| Automatic (non-portable)          | _____<br>- | <input type="checkbox"/> <sub>1</sub> Once a year or more <input type="checkbox"/> <sub>2</sub> Less than once a year <input type="checkbox"/> <sub>3</sub> Never <input type="checkbox"/> <sub>4</sub> Don't know |
| Automatic (portable & wrist cuff) | _____<br>- | <input type="checkbox"/> <sub>1</sub> Once a year or more <input type="checkbox"/> <sub>2</sub> Less than once a year <input type="checkbox"/> <sub>3</sub> Never <input type="checkbox"/> <sub>4</sub> Don't know |
| Automatic (portable & upper arm)  | _____<br>- | <input type="checkbox"/> <sub>1</sub> Once a year or more <input type="checkbox"/> <sub>2</sub> Less than once a year <input type="checkbox"/> <sub>3</sub> Never <input type="checkbox"/> <sub>4</sub> Don't know |

**Availability of medical procedures and laboratory tests:**

|                                                                                    |                                                                                    |                                                                                                                                                                                                  |                                                                                                                                                                                                 |
|------------------------------------------------------------------------------------|------------------------------------------------------------------------------------|--------------------------------------------------------------------------------------------------------------------------------------------------------------------------------------------------|-------------------------------------------------------------------------------------------------------------------------------------------------------------------------------------------------|
| Injection                                                                          | IV fluid                                                                           | Blood sugar test                                                                                                                                                                                 | Blood cholesterol test                                                                                                                                                                          |
| <input type="checkbox"/> <sub>1</sub> Yes <input type="checkbox"/> <sub>2</sub> No | <input type="checkbox"/> <sub>1</sub> Yes <input type="checkbox"/> <sub>2</sub> No | Finger tip <input type="checkbox"/> <sub>1</sub> Yes <input type="checkbox"/> <sub>2</sub> No<br>Venipuncture <input type="checkbox"/> <sub>1</sub> Yes <input type="checkbox"/> <sub>2</sub> No | Fingertip <input type="checkbox"/> <sub>1</sub> Yes <input type="checkbox"/> <sub>2</sub> No<br>Venipuncture <input type="checkbox"/> <sub>1</sub> Yes <input type="checkbox"/> <sub>2</sub> No |
| Pap smear for cancer screening                                                     | Urine protein dipstick testing                                                     | Urine ketone dipstick testing                                                                                                                                                                    |                                                                                                                                                                                                 |
| <input type="checkbox"/> <sub>1</sub> Yes <input type="checkbox"/> <sub>2</sub> No | <input type="checkbox"/> <sub>1</sub> Yes <input type="checkbox"/> <sub>2</sub> No | <input type="checkbox"/> <sub>1</sub> Yes <input type="checkbox"/> <sub>2</sub> No                                                                                                               |                                                                                                                                                                                                 |

| I would like to know if the following items for diagnostic testing are available or not available today | OBSERVED AVAILABLE         |                   |               | NOT OBSERVED |    |            |
|---------------------------------------------------------------------------------------------------------|----------------------------|-------------------|---------------|--------------|----|------------|
|                                                                                                         | OBSERVED                   | REPORTED NOT SEEN | NOT AVAILABLE | YES          | NO | DON'T KNOW |
|                                                                                                         | Dipstick for urine protein | 1                 | 2             | 3            | 1  | 2          |
| Dipstick for urine glucose                                                                              | 1                          | 2                 | 3             | 1            | 2  | 3          |
| Dipstick for urine ketone bodies                                                                        | 1                          | 2                 | 3             | 1            | 2  | 3          |
| X-ray machine                                                                                           | 1                          | 2                 | 3             | 1            | 2  | 3          |
| Ultrasound equipment                                                                                    | 1                          | 2                 | 3             | 1            | 2  | 3          |
| CT scan                                                                                                 | 1                          | 2                 | 3             | 1            | 2  | 3          |
| ECG                                                                                                     | 1                          | 2                 | 3             | 1            | 2  | 3          |

**C. Availability of NCD-specific services**

**Cervical Cancer**

|                                                                                                                                                   |                                                                                                                                                            |                          |                      |                |    |            |
|---------------------------------------------------------------------------------------------------------------------------------------------------|------------------------------------------------------------------------------------------------------------------------------------------------------------|--------------------------|----------------------|----------------|----|------------|
| Do providers in this facility diagnose and/manage cervical cancer?                                                                                | <input type="checkbox"/> <sub>1</sub> Yes <input type="checkbox"/> <sub>2</sub> No                                                                         |                          |                      |                |    |            |
| Do you have a national guideline for diagnosis and management of cervical cancer available in this facility? If available ask to see the document | <input type="checkbox"/> <sub>1</sub> Yes, observed <input type="checkbox"/> <sub>2</sub> Yes, reported, not seen <input type="checkbox"/> <sub>3</sub> No |                          |                      |                |    |            |
| Have you or nay provider (s) received any training in the diagnosis and management of cervical cancer?                                            | <input type="checkbox"/> <sub>1</sub> Yes <input type="checkbox"/> <sub>2</sub> No                                                                         |                          |                      |                |    |            |
| Please tell if the following basic equipment are available in this service area today?                                                            |                                                                                                                                                            |                          |                      |                |    |            |
|                                                                                                                                                   | A) AVAILABLE                                                                                                                                               |                          |                      | B) FUNCTIONING |    |            |
|                                                                                                                                                   | OBSERVE<br>D                                                                                                                                               | REPORTE<br>D NOT<br>SEEN | NOT<br>AVAILABL<br>E | YES            | NO | DON'T KNOW |
| Acetic acid                                                                                                                                       | 1                                                                                                                                                          | 2                        | 3                    | 1              | 2  | 3          |
| Speculum                                                                                                                                          | 1                                                                                                                                                          | 2                        | 3                    | 1              | 2  | 3          |

**Diabetes**

|                                                                                                                                            |                                                                                                                                                            |  |  |  |  |  |
|--------------------------------------------------------------------------------------------------------------------------------------------|------------------------------------------------------------------------------------------------------------------------------------------------------------|--|--|--|--|--|
| Do providers in this facility diagnose and/manage diabetes?                                                                                | <input type="checkbox"/> <sub>1</sub> Yes <input type="checkbox"/> <sub>2</sub> No                                                                         |  |  |  |  |  |
| Do you have a national guideline for diagnosis and management of diabetes available in this facility? If available ask to see the document | <input type="checkbox"/> <sub>1</sub> Yes, observed <input type="checkbox"/> <sub>2</sub> Yes, reported, not seen <input type="checkbox"/> <sub>3</sub> No |  |  |  |  |  |

|                                                                                                 |                                                                                    |
|-------------------------------------------------------------------------------------------------|------------------------------------------------------------------------------------|
| Have you or nay provider (s) received any training in the diagnosis and management of diabetes? | <input type="checkbox"/> <sub>1</sub> Yes <input type="checkbox"/> <sub>2</sub> No |
|-------------------------------------------------------------------------------------------------|------------------------------------------------------------------------------------|

**Cardiovascular disease (CVD)**

|                                                                                                                                       |                                                                                                                                                            |
|---------------------------------------------------------------------------------------------------------------------------------------|------------------------------------------------------------------------------------------------------------------------------------------------------------|
| Do providers in this facility diagnose and/manage CVD?                                                                                | <input type="checkbox"/> <sub>1</sub> Yes <input type="checkbox"/> <sub>2</sub> No                                                                         |
| Do you have a national guideline for diagnosis and management of CVD available in this facility? If available ask to see the document | <input type="checkbox"/> <sub>1</sub> Yes, observed <input type="checkbox"/> <sub>2</sub> Yes, reported, not seen <input type="checkbox"/> <sub>3</sub> No |
| Have you or nay provider (s) received any training in the diagnosis and management of CVD?                                            | <input type="checkbox"/> <sub>1</sub> Yes <input type="checkbox"/> <sub>2</sub> No                                                                         |

**Chronic respiratory disease (CRD)**

|                                                                                                                                                               |                                                                                                                                                            |
|---------------------------------------------------------------------------------------------------------------------------------------------------------------|------------------------------------------------------------------------------------------------------------------------------------------------------------|
| Do providers in this facility diagnose and/manage chronic respiratory diseases?                                                                               | <input type="checkbox"/> <sub>1</sub> Yes <input type="checkbox"/> <sub>2</sub> No                                                                         |
| Do you have a national guideline for diagnosis and management of chronic respiratory disease available in this facility? If available ask to see the document | <input type="checkbox"/> <sub>1</sub> Yes, observed <input type="checkbox"/> <sub>2</sub> Yes, reported, not seen <input type="checkbox"/> <sub>3</sub> No |
| Have you or nay provider (s) received any training in the diagnosis and management of chronic respiratory diseases?                                           | <input type="checkbox"/> <sub>1</sub> Yes <input type="checkbox"/> <sub>2</sub> No                                                                         |
|                                                                                                                                                               | A) AVAILABLE                                                                                                                                               |
|                                                                                                                                                               | B) FUNCTIONING                                                                                                                                             |

| Please tell if the following basic equipment are available in this service area today? | OBSERVE<br>D | REPORTED<br>NOT<br>SEEN | NOT<br>AVAILABL<br>E | YES | NO | DON'T KNOW |
|----------------------------------------------------------------------------------------|--------------|-------------------------|----------------------|-----|----|------------|
| Peak flow meters                                                                       | 1            | 2                       | 3                    | 1   | 2  | 3          |
| Spacers for inhalers                                                                   | 1            | 2                       | 3                    | 1   | 2  | 3          |

#### D. Medicine

| Medicine                                    | Availability                                                                                                                          | Prescription right                                                                 |
|---------------------------------------------|---------------------------------------------------------------------------------------------------------------------------------------|------------------------------------------------------------------------------------|
| Acetylsalicylic acid (aspirin)              | <input type="checkbox"/> <sub>1</sub> Always <input type="checkbox"/> <sub>2</sub> Sometimes <input type="checkbox"/> <sub>3</sub> No | <input type="checkbox"/> <sub>1</sub> Yes <input type="checkbox"/> <sub>2</sub> No |
| Angiotensin inhibitor (enalapril)           | <input type="checkbox"/> <sub>1</sub> Always <input type="checkbox"/> <sub>2</sub> Sometimes <input type="checkbox"/> <sub>3</sub> No | <input type="checkbox"/> <sub>1</sub> Yes <input type="checkbox"/> <sub>2</sub> No |
| Beta-blocker (atenolol)                     | <input type="checkbox"/> <sub>1</sub> Always <input type="checkbox"/> <sub>2</sub> Sometimes <input type="checkbox"/> <sub>3</sub> No | <input type="checkbox"/> <sub>1</sub> Yes <input type="checkbox"/> <sub>2</sub> No |
| Calcium channel blocker Now<br>(amlodipine) | <input type="checkbox"/> <sub>1</sub> Always <input type="checkbox"/> <sub>2</sub> Sometimes <input type="checkbox"/> <sub>3</sub> No | <input type="checkbox"/> <sub>1</sub> Yes <input type="checkbox"/> <sub>2</sub> No |
| Epinephrine                                 | <input type="checkbox"/> <sub>1</sub> Always <input type="checkbox"/> <sub>2</sub> Sometimes <input type="checkbox"/> <sub>3</sub> No | <input type="checkbox"/> <sub>1</sub> Yes <input type="checkbox"/> <sub>2</sub> No |
| Furosemide                                  | <input type="checkbox"/> <sub>1</sub> Always <input type="checkbox"/> <sub>2</sub> Sometimes <input type="checkbox"/> <sub>3</sub> No | <input type="checkbox"/> <sub>1</sub> Yes <input type="checkbox"/> <sub>2</sub> No |
| Glyceryl trinitrate                         | <input type="checkbox"/> <sub>1</sub> Always <input type="checkbox"/> <sub>2</sub> Sometimes <input type="checkbox"/> <sub>3</sub> No | <input type="checkbox"/> <sub>1</sub> Yes <input type="checkbox"/> <sub>2</sub> No |
| Heparin                                     | <input type="checkbox"/> <sub>1</sub> Always <input type="checkbox"/> <sub>2</sub> Sometimes <input type="checkbox"/> <sub>3</sub> No | <input type="checkbox"/> <sub>1</sub> Yes <input type="checkbox"/> <sub>2</sub> No |
| Isosorbide dinitrate                        | <input type="checkbox"/> <sub>1</sub> Always <input type="checkbox"/> <sub>2</sub> Sometimes <input type="checkbox"/> <sub>3</sub> No | <input type="checkbox"/> <sub>1</sub> Yes <input type="checkbox"/> <sub>2</sub> No |
| Spirolactone                                | <input type="checkbox"/> <sub>1</sub> Always <input type="checkbox"/> <sub>2</sub> Sometimes <input type="checkbox"/> <sub>3</sub> No | <input type="checkbox"/> <sub>1</sub> Yes <input type="checkbox"/> <sub>2</sub> No |
| Statin (simvastatin)                        | <input type="checkbox"/> <sub>1</sub> Always <input type="checkbox"/> <sub>2</sub> Sometimes <input type="checkbox"/> <sub>3</sub> No | <input type="checkbox"/> <sub>1</sub> Yes <input type="checkbox"/> <sub>2</sub> No |
| Thiazide diuretic                           | <input type="checkbox"/> <sub>1</sub> Always <input type="checkbox"/> <sub>2</sub> Sometimes <input type="checkbox"/> <sub>3</sub> No | <input type="checkbox"/> <sub>1</sub> Yes <input type="checkbox"/> <sub>2</sub> No |
| Insulin                                     | <input type="checkbox"/> <sub>1</sub> Always <input type="checkbox"/> <sub>2</sub> Sometimes <input type="checkbox"/> <sub>3</sub> No | <input type="checkbox"/> <sub>1</sub> Yes <input type="checkbox"/> <sub>2</sub> No |
| Metformin                                   | <input type="checkbox"/> <sub>1</sub> Always <input type="checkbox"/> <sub>2</sub> Sometimes <input type="checkbox"/> <sub>3</sub> No | <input type="checkbox"/> <sub>1</sub> Yes <input type="checkbox"/> <sub>2</sub> No |
| Glibenclamide                               | <input type="checkbox"/> <sub>1</sub> Always <input type="checkbox"/> <sub>2</sub> Sometimes <input type="checkbox"/> <sub>3</sub> No | <input type="checkbox"/> <sub>1</sub> Yes <input type="checkbox"/> <sub>2</sub> No |
| Verapamil                                   | <input type="checkbox"/> <sub>1</sub> Always <input type="checkbox"/> <sub>2</sub> Sometimes <input type="checkbox"/> <sub>3</sub> No | <input type="checkbox"/> <sub>1</sub> Yes <input type="checkbox"/> <sub>2</sub> No |

|                     |                                                                                                                                       |                                                                                    |
|---------------------|---------------------------------------------------------------------------------------------------------------------------------------|------------------------------------------------------------------------------------|
| Digoxin             | <input type="checkbox"/> <sub>1</sub> Always <input type="checkbox"/> <sub>2</sub> Sometimes <input type="checkbox"/> <sub>3</sub> No | <input type="checkbox"/> <sub>1</sub> Yes <input type="checkbox"/> <sub>2</sub> No |
| Lignocaine          | <input type="checkbox"/> <sub>1</sub> Always <input type="checkbox"/> <sub>2</sub> Sometimes <input type="checkbox"/> <sub>3</sub> No | <input type="checkbox"/> <sub>1</sub> Yes <input type="checkbox"/> <sub>2</sub> No |
| Hydralazine         | <input type="checkbox"/> <sub>1</sub> Always <input type="checkbox"/> <sub>2</sub> Sometimes <input type="checkbox"/> <sub>3</sub> No | <input type="checkbox"/> <sub>1</sub> Yes <input type="checkbox"/> <sub>2</sub> No |
| Hydrochlorothiazide | <input type="checkbox"/> <sub>1</sub> Always <input type="checkbox"/> <sub>2</sub> Sometimes <input type="checkbox"/> <sub>3</sub> No | <input type="checkbox"/> <sub>1</sub> Yes <input type="checkbox"/> <sub>2</sub> No |
| Methyldopa          | <input type="checkbox"/> <sub>1</sub> Always <input type="checkbox"/> <sub>2</sub> Sometimes <input type="checkbox"/> <sub>3</sub> No | <input type="checkbox"/> <sub>1</sub> Yes <input type="checkbox"/> <sub>2</sub> No |

**Supplement List**

|                      |                                                                                                                                       |                                                                                    |
|----------------------|---------------------------------------------------------------------------------------------------------------------------------------|------------------------------------------------------------------------------------|
| Amiodarone           | <input type="checkbox"/> <sub>1</sub> Always <input type="checkbox"/> <sub>2</sub> Sometimes <input type="checkbox"/> <sub>3</sub> No | <input type="checkbox"/> <sub>1</sub> Yes <input type="checkbox"/> <sub>2</sub> No |
| Sodium nitroprusside | <input type="checkbox"/> <sub>1</sub> Always <input type="checkbox"/> <sub>2</sub> Sometimes <input type="checkbox"/> <sub>3</sub> No | <input type="checkbox"/> <sub>1</sub> Yes <input type="checkbox"/> <sub>2</sub> No |
| Dopamine             | <input type="checkbox"/> <sub>1</sub> Always <input type="checkbox"/> <sub>2</sub> Sometimes <input type="checkbox"/> <sub>3</sub> No | <input type="checkbox"/> <sub>1</sub> Yes <input type="checkbox"/> <sub>2</sub> No |
| Streptokinase        | <input type="checkbox"/> <sub>1</sub> Always <input type="checkbox"/> <sub>2</sub> Sometimes <input type="checkbox"/> <sub>3</sub> No | <input type="checkbox"/> <sub>1</sub> Yes <input type="checkbox"/> <sub>2</sub> No |

**That's end. Thanks for your participation!**
